# Supplementary material for: Catch of<em> Reesa vespulae</em> in Heritage Environments
Source: Preprints.org preprint supplement (doi:10.20944/preprints202405.0660.v1), 2024-05-10
Supplement: Supplementary file 1 [file supplementary]

|  |  |  |  |  |  |  |  |  |  |  |
| --- | --- | --- | --- | --- | --- | --- | --- | --- | --- | --- |
|  |  |  |  |  |  |  |  |  |  |  |
|  |  |  |  |  |  |  |  |  |  |  |
|  |  |  |  |  |  |  |  |  |  |  |
|  |  |  |  |  |  |  |  |  |  |  |
|  |  |  |  |  |  |  |  |  |  |  |
|  |  |  |  |  |  |  |  |  |  |  |
|  |  |  |  |  |  |  |  |  |  |  |
|  |  |  |  |  |  |  |  |  |  |  |
|  |  |  |  |  |  |  |  |  |  |  |
|  |  |  |  |  |  |  |  |  |  |  |
|  |  |  |  |  |  |  |  |  |  |  |
|  |  |  |  |  |  |  |  |  |  |  |
|  |  |  |  |  |  |  |  |  |  |  |
|  |  |  |  |  |  |  |  |  |  |  |
|  |  |  |  |  |  |  |  |  |  |  |
|  |  |  |  |  |  |  |  |  |  |  |
|  |  |  |  |  |  |  |  |  |  |  |
|  |  |  |  |  |  |  |  |  |  |  |
|  |  |  |  |  |  |  |  |  |  |  |
|  |  |  |  |  |  |  |  |  |  |  |
|  |  |  |  |  |  |  |  |  |  |  |
|  |  |  |  |  |  |  |  |  |  |  |
|  |  |  |  |  |  |  |  |  |  |  |
|  |  |  |  |  |  |  |  |  |  |  |
|  |  |  |  |  |  |  |  |  |  |  |
|  |  |  |  |  |  |  |  |  |  |  |

Supplementary table NM = no monitoring , - means no Reesa vespulae. lL=larvae

|  | 2014 | 2015 | 2016 | 2017 | 2018 | 2019 | 2020 | 2021 | 2022 | 2023 |
| --- | --- | --- | --- | --- | --- | --- | --- | --- | --- | --- |
| Vienna | - | - | - | - | 4 | 4 | 2 | 1 | 4 | 2 |
| Vienna | NM | NM | - | - | - | 3 | 1 | 1 | 0 | 9+1 l. |
| Vienna | - | - | - | - | - | 1 | - | - | - | - |
| Vienna | - | - | - | - | - | 1 | 1 | 1 | 1 | - |
| Lower Austria | - | - | - | - | - | 1 | - | - | - | - |
| Entom. | NM | NM | NM | NM | NM | NM | 41 | NM | NM | NM |
| Vorarlberg | - | - | - | - | - | - | 2 | 3 | 5 | 1 |
| Vienna | - | - | - | - | - | - | 1 | - | - | - |
| Vienna | - | - | - | - | - | - | 2 | - | - | - |
| Vienna | - | - | - | - | - | - | 1 | - | - | - |
| Lower Austria | - | - | - | - | - | - | 1 | - | - | 2+1 l. |
| Vienna | NM | NM | NM | NM | NM | NM | NM | 6 | 21 | 9 |
| Salzburg | - | - | - | - | - | - | - | 1 | 1 | - |
| Lower Austria | - | - | - | - | - | - | - | 1 + 2 l. | - | - |
| Vienna | - | - | - | - | - | - | - | 1 | - | - |
| Vienna | - | - | - | - | - | - | - | 1 | - | - |
| Vienna | - | - | - | - | - | - | - | - | 1+1 l. | 2 l. |
| Vienna | - | - | - | - | - | - | - | - | 1 | - |
| Vienna | - | - | - | - | - | - | - | - | 1 | ? |
| Vienna | - | - | - | - | - | - | - | - | - | 1 |
| Vienna | - | - | - | - | - | - | - | - | - | 1 |
| Vorarlberg | - | - | - | - | - | - | - | - | - | 5 |
| Vienna | - | - | - | - | - | - | - | - | - | 1 |
| Vienna | - | - | - | - | - | - | - | - | - | 1 |
| Vienna | NM | NM | NM | NM | NM | NM | NM | - | - | 2 |
|  |  |  |  |  |  |  |  |  |  |  |
